# Supplementary material for: Strong hyperconjugative interactions limit solvent and substituent influence on conformational equilibrium: the case of cis-2-halocyclohexylamines
Source: Beilstein J Org Chem. 2019 Apr 1;15:818–29. doi: 10.3762/bjoc.15.79 (PMC6466766; doi:10.3762/bjoc.15.79)
Supplement: File 2 — NBO data for PCA. [file Beilstein_J_Org_Chem-15-818-s002.xlsx]

## Sheet: NBO-total
Halo	Conf	Rot	C 1-C2	C1-C6	C1-H	C1-N	C2-C3	C2-H	C2-X	C3-C4	C3-Heq	C3-Hax	C4-C5	C4-Hax	C4-Heq	C5-C6	C5-Heq	C5-Hax	C6-Hax	C6-Heq	N-H18	N0-H19	LPN	LPX
F	ae	A	29.58	25.26	24.56	15.28	23.16	25.26	15.77	18.17	15.7	17.41	17.33	16.4	15.47	17.9	15.55	16.67	16.84	15.68	6.68	7.32	12.65	24.02
F	ae	X	30.89	26.61	24.45	15.19	23.63	26.28	14.86	17.76	16.02	17.25	17.31	16.82	15.35	17.5	15.9	16.86	17.85	15.3	7.82	7.24	14.68	26.09
F	ae	H	31.42	24.67	25.59	15.36	23.01	26.32	15.62	17.95	15.93	17.48	17.24	16.8	15.33	17.83	15.85	16.68	17.2	15.8	7.97	7.54	14.56	24.23
F	ea	A	30.89	25.16	27.89	14.04	23.02	24.21	17.78	17.89	15.8	17.77	17.37	16.52	15.48	17.82	15.44	16.67	17.15	15.95	6.77	6.95	13.36	25.13
F	ea	X	29.81	27.68	32.15	14.24	22.44	21.76	22.6	18.27	15.72	21.43	17.42	16.81	15.75	18.61	15.38	16.72	17.18	15.73	8.59	7.32	14.48	18.49
F	ea	H	31.18	25.26	27.49	13.69	23.39	23.64	18.58	17.95	15.88	18.28	17.39	16.49	15.46	17.78	15.49	16.86	17.37	15.95	7.25	7.94	13.5	23.72
Cl	ae	A	29.65	28.52	25.16	15.57	22.71	23.15	18.3	21.11	15.96	17.3	17.39	16.3	15.64	17.94	15.65	16.67	16.73	15.83	7.01	7.72	12.92	18.17
Cl	ae	X	30.78	29.55	24.66	15.61	22.97	23.75	17.46	20.68	16.16	17.28	17.35	16.8	15.48	17.55	16.02	16.91	17.8	15.38	7.43	7.88	14.83	18.91
Cl	ae	H	32.08	27.88	25.73	15.55	22.44	24.22	17.8	21.02	16.21	17.41	17.35	16.8	15.52	17.91	16	16.77	17.08	15.96	8.1	8.02	15.43	18.26
Cl	ea	A	30.75	26.02	31.84	14.55	22.6	22.01	21.75	18.18	15.67	20.94	17.46	16.82	15.74	17.99	15.42	16.67	17.49	16.16	7.08	7.07	13.64	19.05
Cl	ea	X	29.81	27.68	32.15	14.24	22.44	21.76	22.6	18.27	15.72	21.43	17.42	16.81	15.75	18.61	15.38	16.72	17.18	15.73	8.59	7.32	14.48	18.49
Cl	ea	H	32.26	25.58	31.67	14.03	23.06	21.4	22.14	18.27	15.69	21.41	17.41	16.85	15.75	17.9	15.45	16.81	17.59	16.24	7.45	8.42	14.49	18.45
Br	ae	A	28.84	29.75	25.37	15.74	21.71	21.66	20.88	22.19	16.17	17.47	17.33	16.25	15.69	17.84	15.66	16.68	16.65	15.88	7.19	8.04	12.9	14.61
Br	ae	X	29.57	30.85	25	15.74	21.86	22.15	20.02	21.73	16.35	17.4	17.32	16.77	15.55	17.48	16.07	16.88	17.75	15.44	7.94	7.53	14.92	14.78
Br	ae	H	31.34	29.12	25.83	15.71	21.43	22.65	20.44	22.11	16.42	17.6	17.28	16.75	15.6	17.82	16	16.79	17.05	15.99	8.09	8.25	15.58	14.57
Br	ea	A	29.86	26.39	33.53	14.82	21.61	20.47	25.31	18.47	15.81	22.3	17.43	16.99	15.81	17.94	15.38	16.65	17.62	16.28	7.27	7	13.76	15.26
Br	ea	X	29.07	27.99	33.86	14.49	21.55	20.29	26.22	18.53	15.86	22.88	17.38	16.97	15.85	18.6	15.34	16.7	17.35	15.84	8.94	7.5	14.5	15.15
Br	ea	H	31.63	25.85	33.5	14.31	22.13	19.91	25.7	18.57	15.88	22.85	17.39	16.97	15.87	17.88	15.43	16.8	17.81	16.42	7.41	8.67	14.84	15
I	ae	A	28.59	30.35	25.59	15.94	20.83	20.28	22.52	22.7	16.29	17.7	17.35	16.19	15.91	17.82	15.71	16.73	16.6	16.07	7.48	8.14	12.87	11.06
I	ae	X	28.89	31.53	25.41	16.06	20.88	20.64	21.69	22.16	16.5	17.54	17.31	16.69	15.75	17.46	16.08	16.96	17.64	15.6	7.98	7.82	14.94	10.75
I	ae	H	31.14	29.81	25.93	15.95	20.55	21.2	22.01	22.57	16.58	17.8	17.27	16.68	15.76	17.76	16.06	16.84	16.93	16.15	8.06	8.46	15.97	10.96
I	ea	A	29.28	26.77	34.41	15.21	20.7	19	28.21	18.74	15.95	22.98	17.45	17.23	16.05	17.97	15.37	16.68	17.83	16.47	7.54	7.02	13.93	11.39
I	ea	X	28.71	28.36	34.76	14.8	20.75	18.97	28.77	18.81	15.96	23.62	17.38	17.24	16.09	18.62	15.33	16.73	17.57	16.05	9.14	7.87	14.35	11.92
I	ea	H	31.35	26.03	34.71	14.55	21.26	18.5	28.36	18.83	15.96	23.56	17.37	17.21	16.09	17.9	15.44	16.8	17.97	16.62	7.38	8.84	15.32	11.51
